# Supplementary material for: Synapse-specific and compartmentalized expression of presynaptic homeostatic potentiation
Source: eLife journal article supplement (doi:10.7554/elife.34338), 2018-04-05
Supplement: supp [file elife-34338-supp-v1.zip]

Archive with 4 entries (4 files):
- elife_poa_e34338_Supplementary_File_1.docx
- elife_poa_e34338_Figure_1_figure_supplement_1.tif
- elife_poa_e34338_Figure_2_figure_supplement_1.tif
- elife_poa_e34338_Transparent_Reporting_File.pdf
