# Supplementary figures and images for: Synapse-specific and compartmentalized expression of presynaptic homeostatic potentiation
Source: eLife journal article supplement (doi:10.7554/elife.34338), 2018-04-05

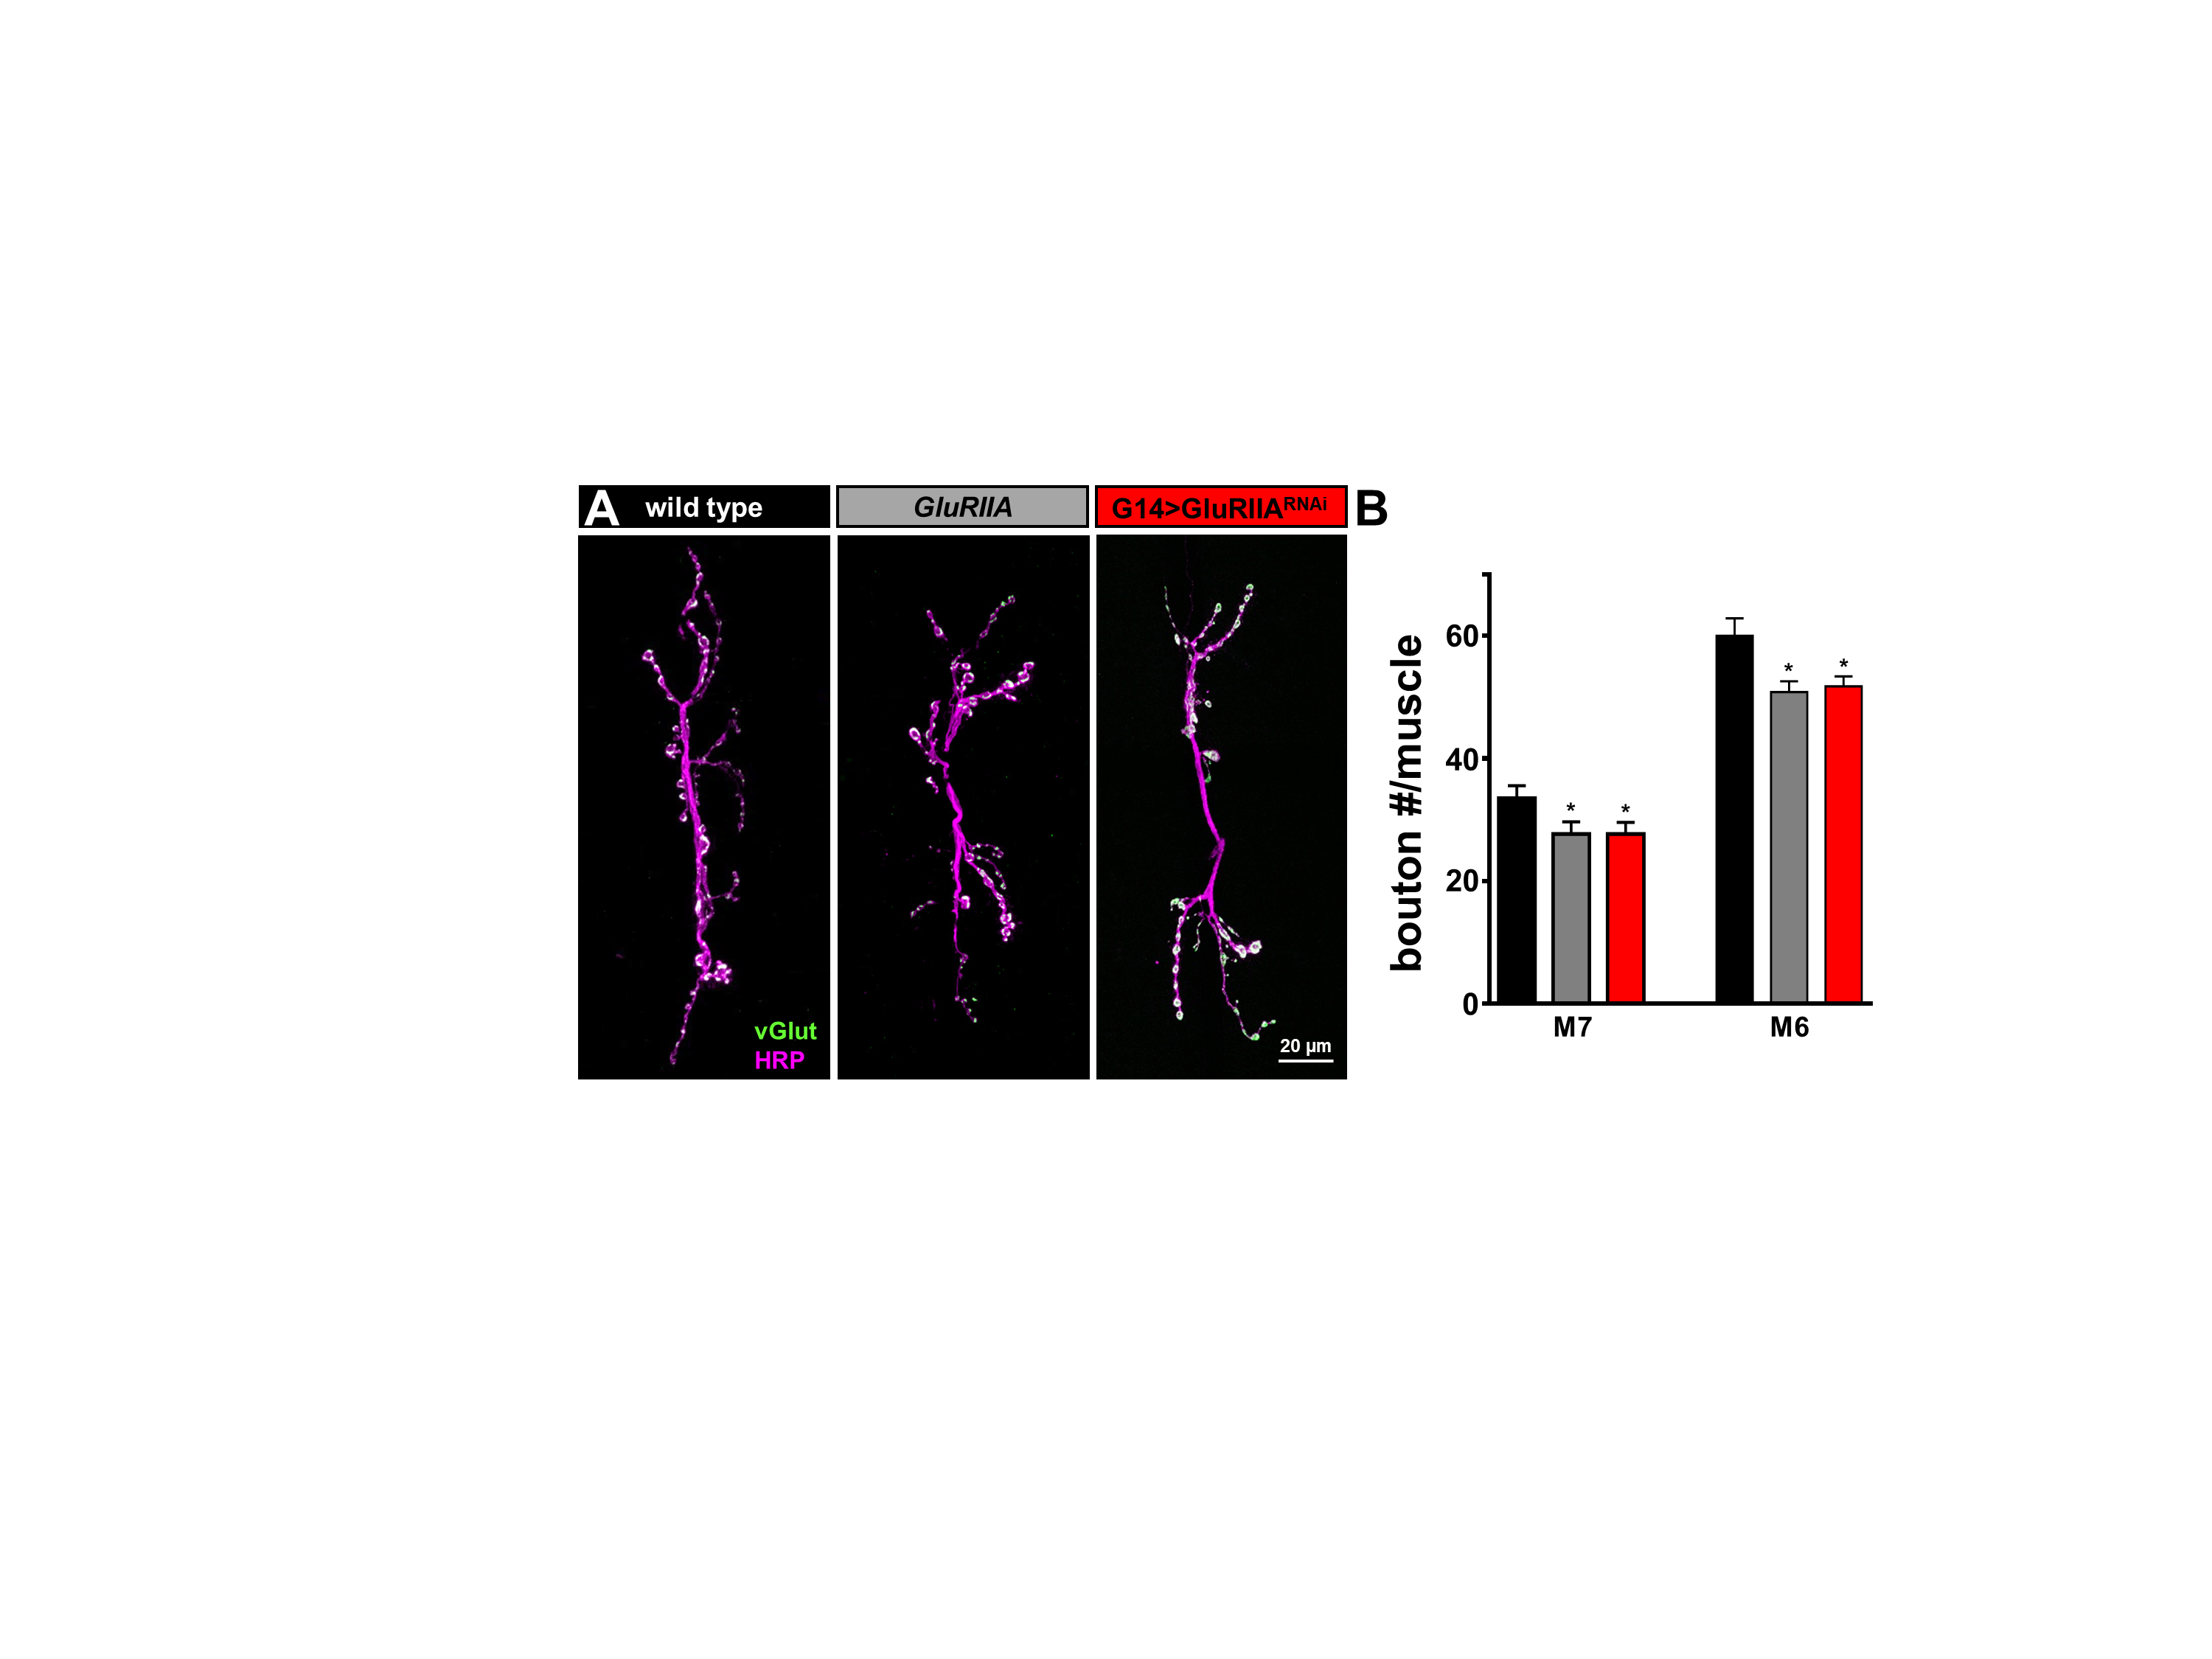

Supplement: supp [file elife-34338-supp-v1.zip › elife_poa_e34338_Figure_1_figure_supplement_1.tif]

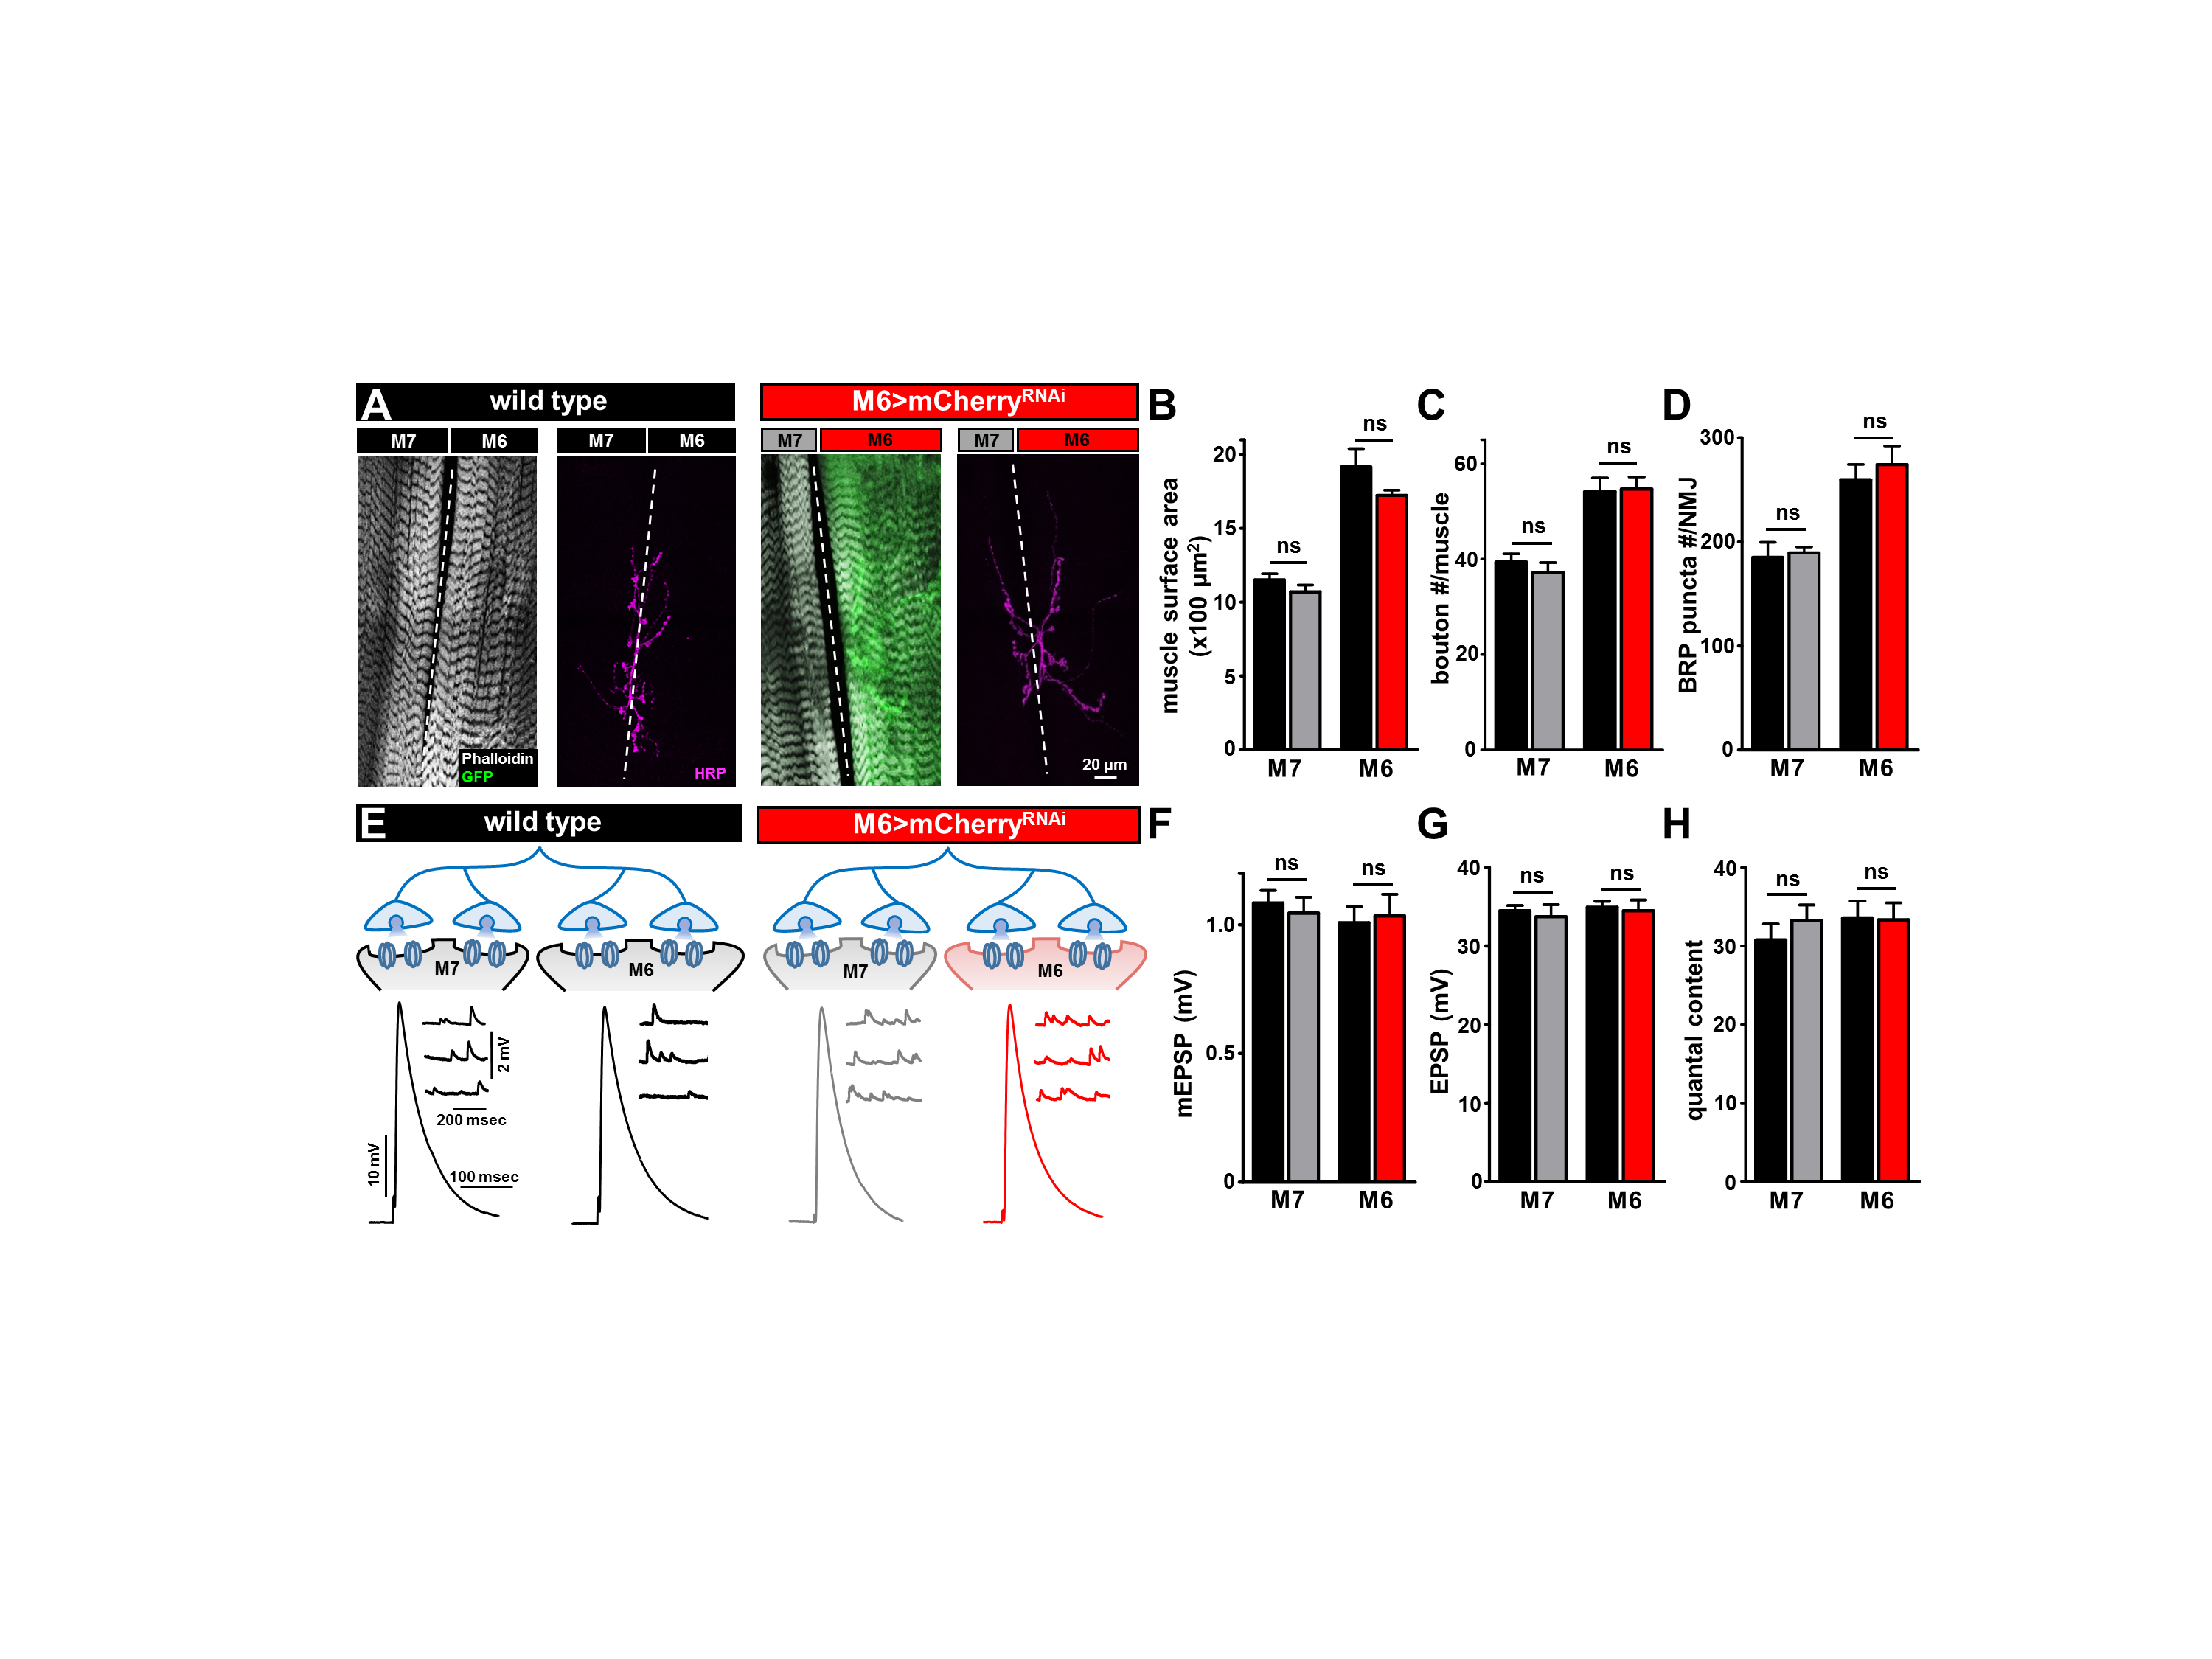

Supplement: supp [file elife-34338-supp-v1.zip › elife_poa_e34338_Figure_2_figure_supplement_1.tif]
